# Supplementary material for: Fiber-specific structural properties relate to reading skills in children and adolescents
Source: eLife journal article supplement (doi:10.7554/elife.82088), 2022-12-23
Supplement: supp [file elife-82088-supp-v1.zip]

## Supplementary Material

| Metric         | <i>F</i> -statistic | CBIC<br>vs. CUNY<br><i>t</i> -stat | CUNY<br>vs. RU<br><i>t</i> -stat | RU<br>vs. SI<br><i>t</i> -stat | CBIC<br>vs. RU<br><i>t</i> -stat | CUNY<br>vs. SI<br><i>t</i> -stat | CBIC<br>vs. SI<br><i>t</i> -stat |
|----------------|---------------------|------------------------------------|----------------------------------|--------------------------------|----------------------------------|----------------------------------|----------------------------------|
| Age            | 2.30                | -                                  | -                                | -                              | -                                | -                                | -                                |
| EHI            | 0.12                | -                                  | -                                | -                              | -                                | -                                | -                                |
| SES            | 10.67*              | -                                  | -                                | 2.81                           | 3.53                             | 3.51                             | 3.72                             |
| ICV            | 19.47*              | -2.24                              | 5.01                             | -                              | 6.50                             | 4.05                             | 3.23                             |
| WISC VCI       | 8.06*               | -                                  | -                                | -                              | 4.72                             | -                                | -                                |
| WISC VSI       | 9.31*               | -                                  | -                                | -                              | 5.17                             | -                                | -                                |
| TOWRE          | 2.30                | -                                  | -                                | -                              | -                                | -                                | -                                |
| gFD            | 152.8*              | -9.63                              | -                                | 1.30                           | -1.97                            | 1.04                             | 4.30                             |
| gFC            | 4.04*               | -                                  | -                                | 2.11                           | 2.09                             | 2.79                             | 2.84                             |
| Motion         | 35.83*              | -                                  | -                                | -5.17                          | -8.11                            | -4.47                            | -7.61                            |
| Neighbor Corr. | 11.59*              | -5.82                              | 5.24                             | -                              | -                                | 2.99                             | -                                |

**Supplementary File 1.** ANOVA results for site-wise comparisons between phenotypic and neuroimaging metrics. Group comparison columns list significant *t*-statistics. \* denotes  $p < 0.05$  for the ANOVA between all sites. *Post-hoc t*-tests were only run if the between-sites ANOVA was significant. Only significant *t*-statistics ( $p < 0.05$ ) are shown in the table. A positive *t*-statistic denotes Site 1 > Site 2. *Abbreviations:* EHI - Edinburgh Handedness Inventory; SES - socioeconomic status; ICV - intracranial volume; TOWRE - Tests of Word Reading Efficiency composite score, age-normalized; WISC VSI - Wechsler Intelligence Scale for Children visuospatial index, age-normalized; WISC VCI - Wechsler Intelligence Scale for Children verbal comprehension index, age-normalized; gFD - globally-averaged fiber density; gFC - globally-averaged fiber cross-section.
