# Supplementary figures and images for: Fiber-specific structural properties relate to reading skills in children and adolescents
Source: eLife journal article supplement (doi:10.7554/elife.82088), 2022-12-23

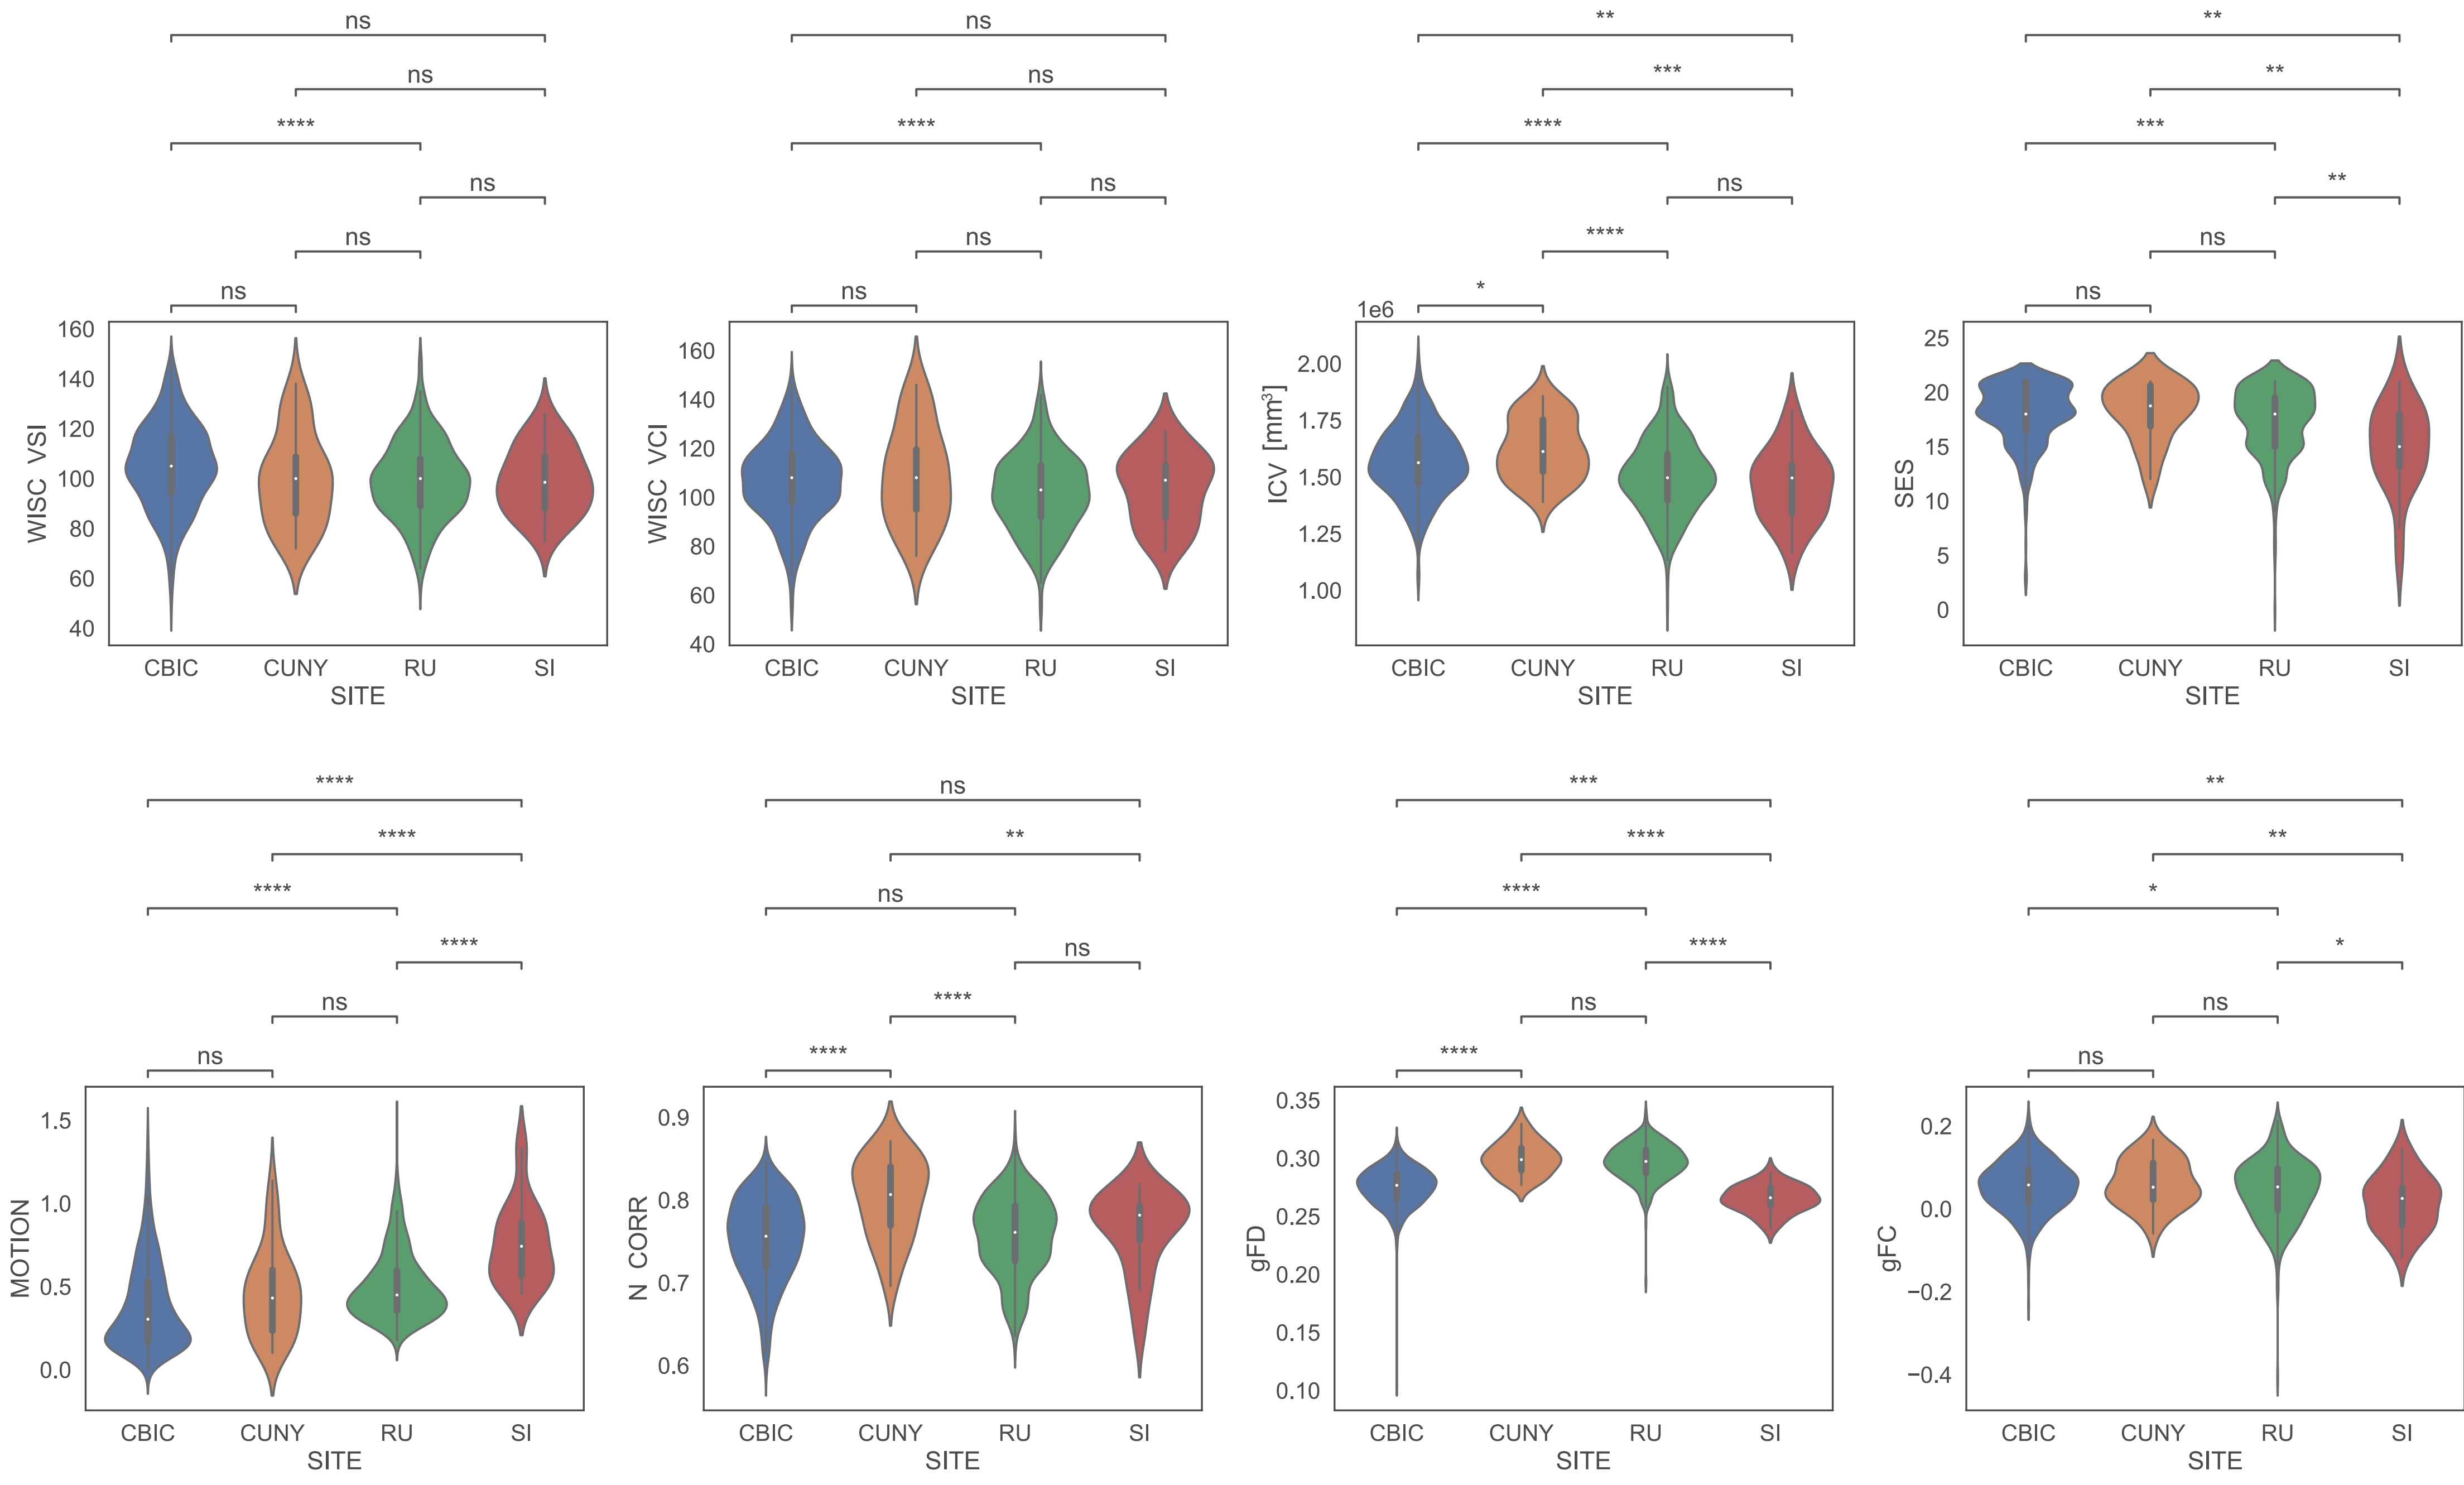

Supplement: supp [file elife-82088-supp-v1.zip]

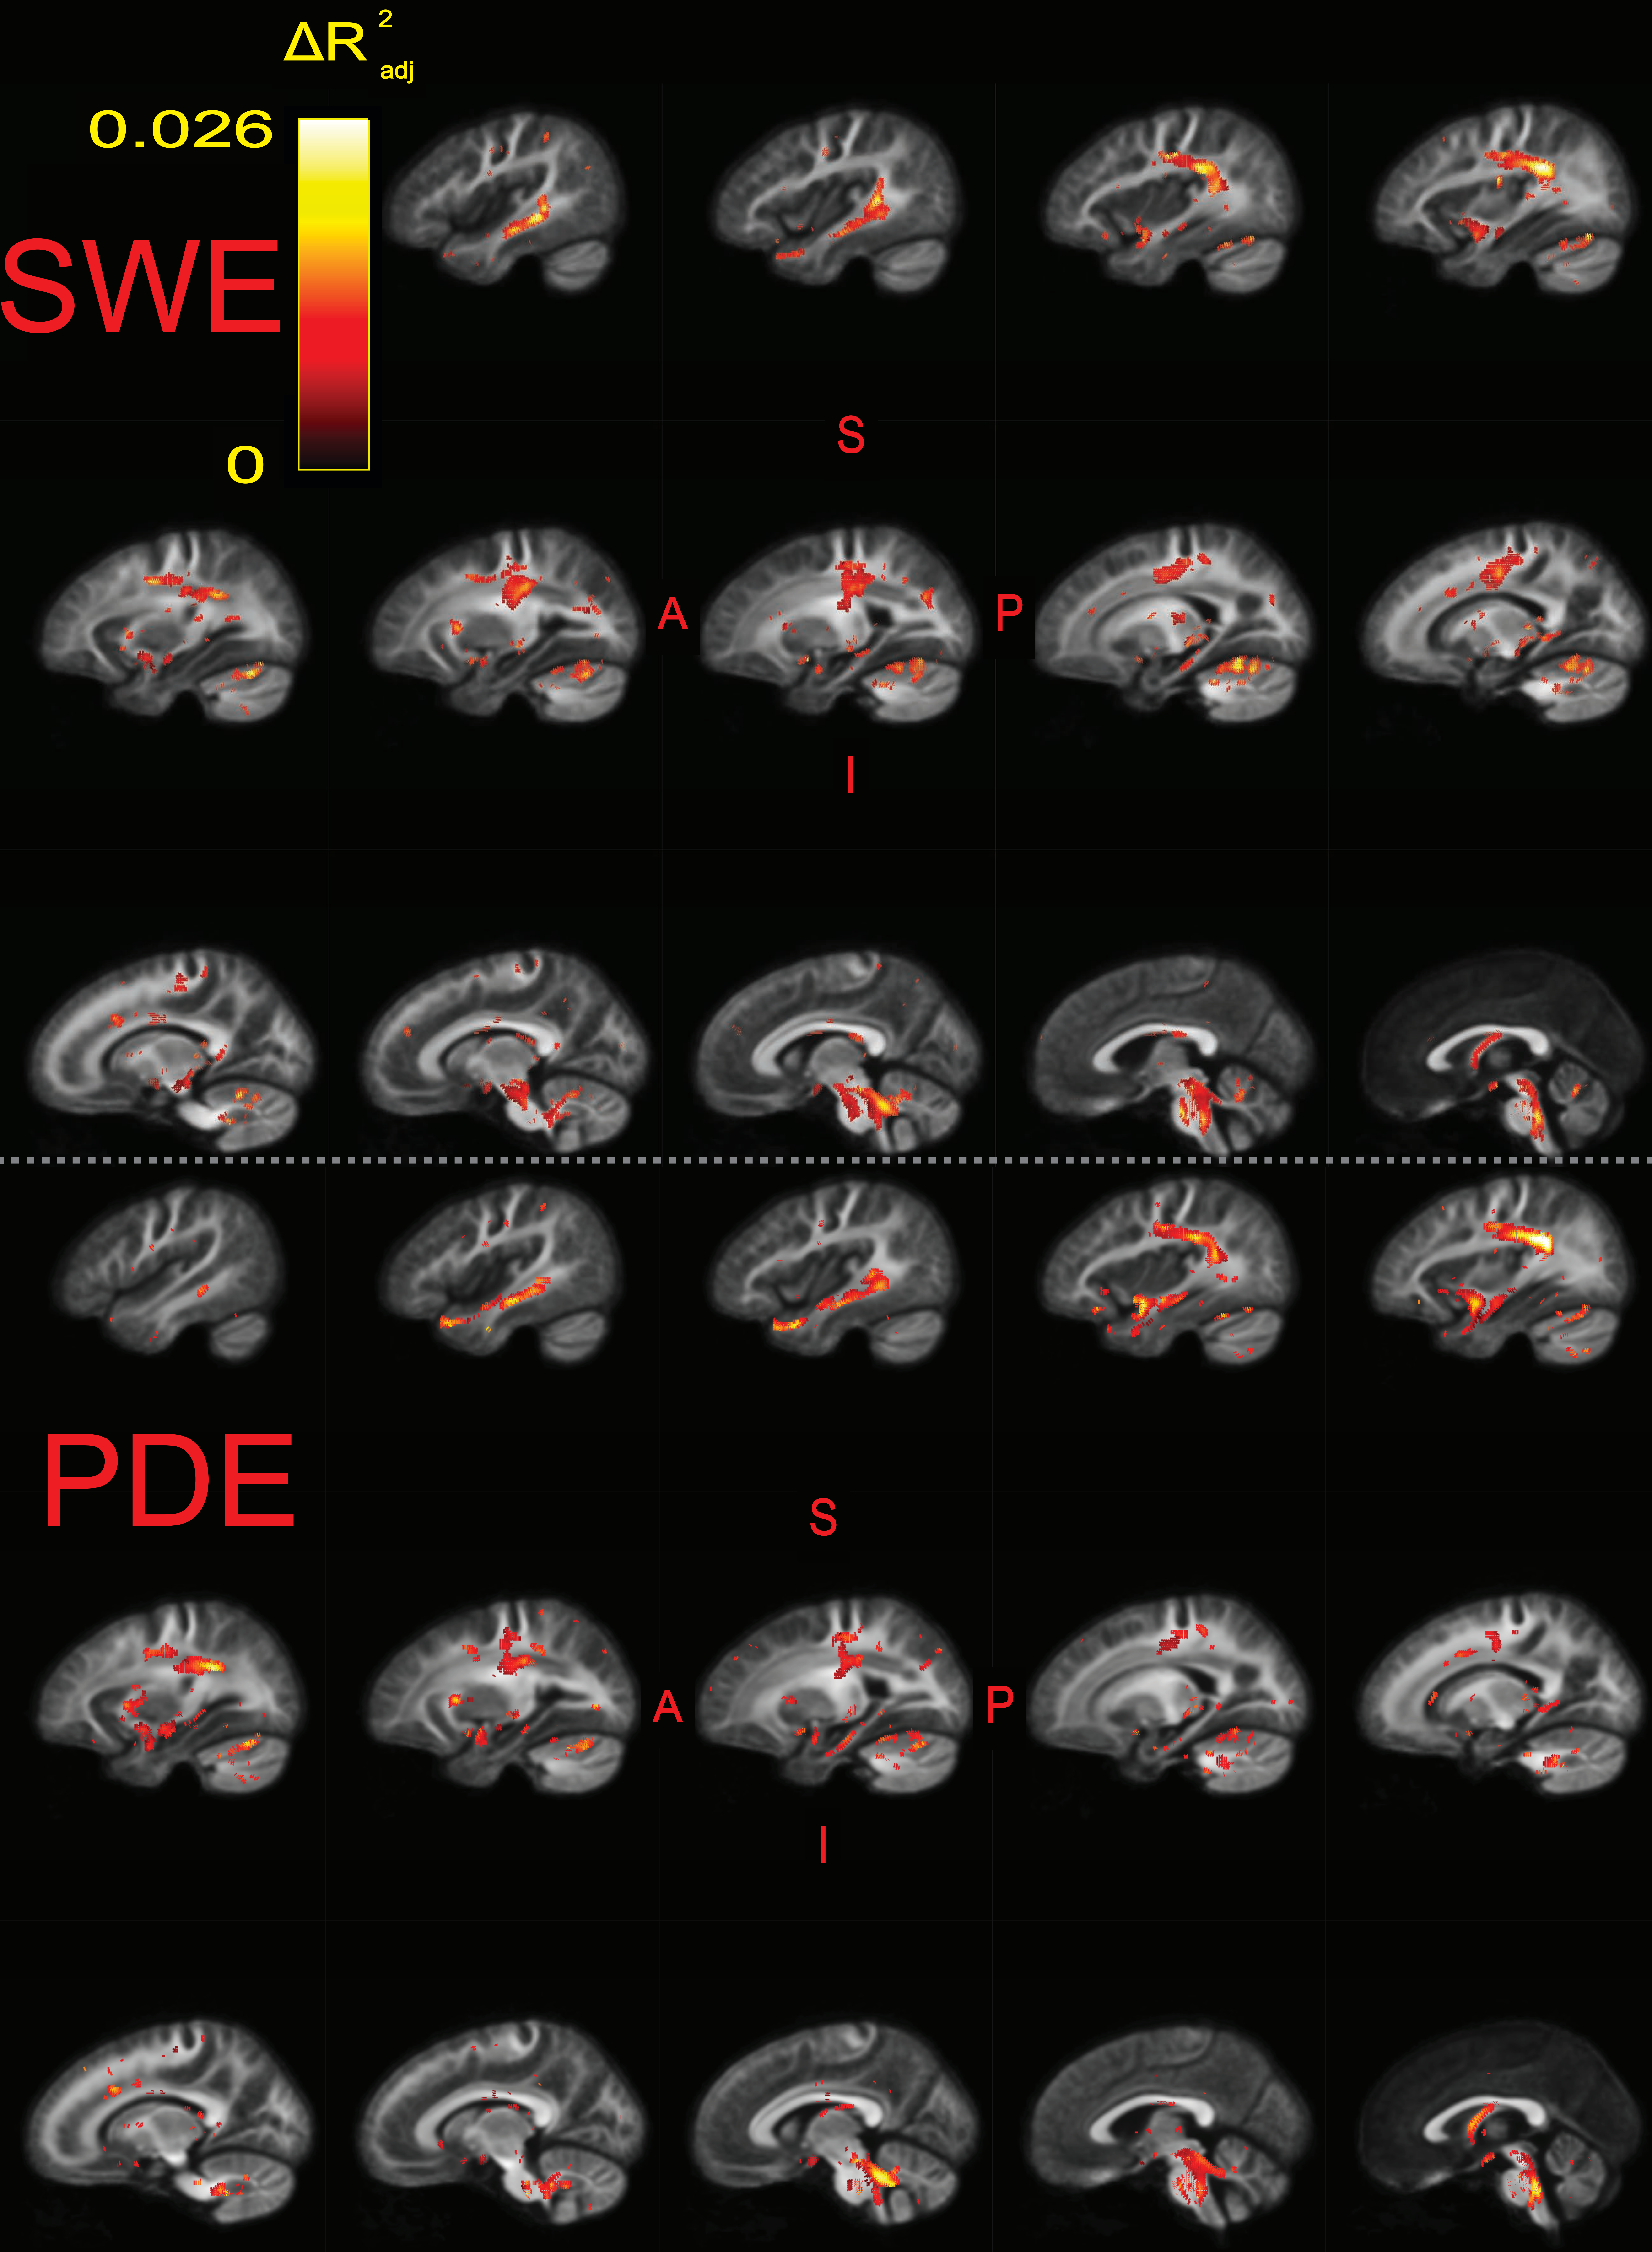

Supplement: supp [file elife-82088-supp-v1.zip]

FC

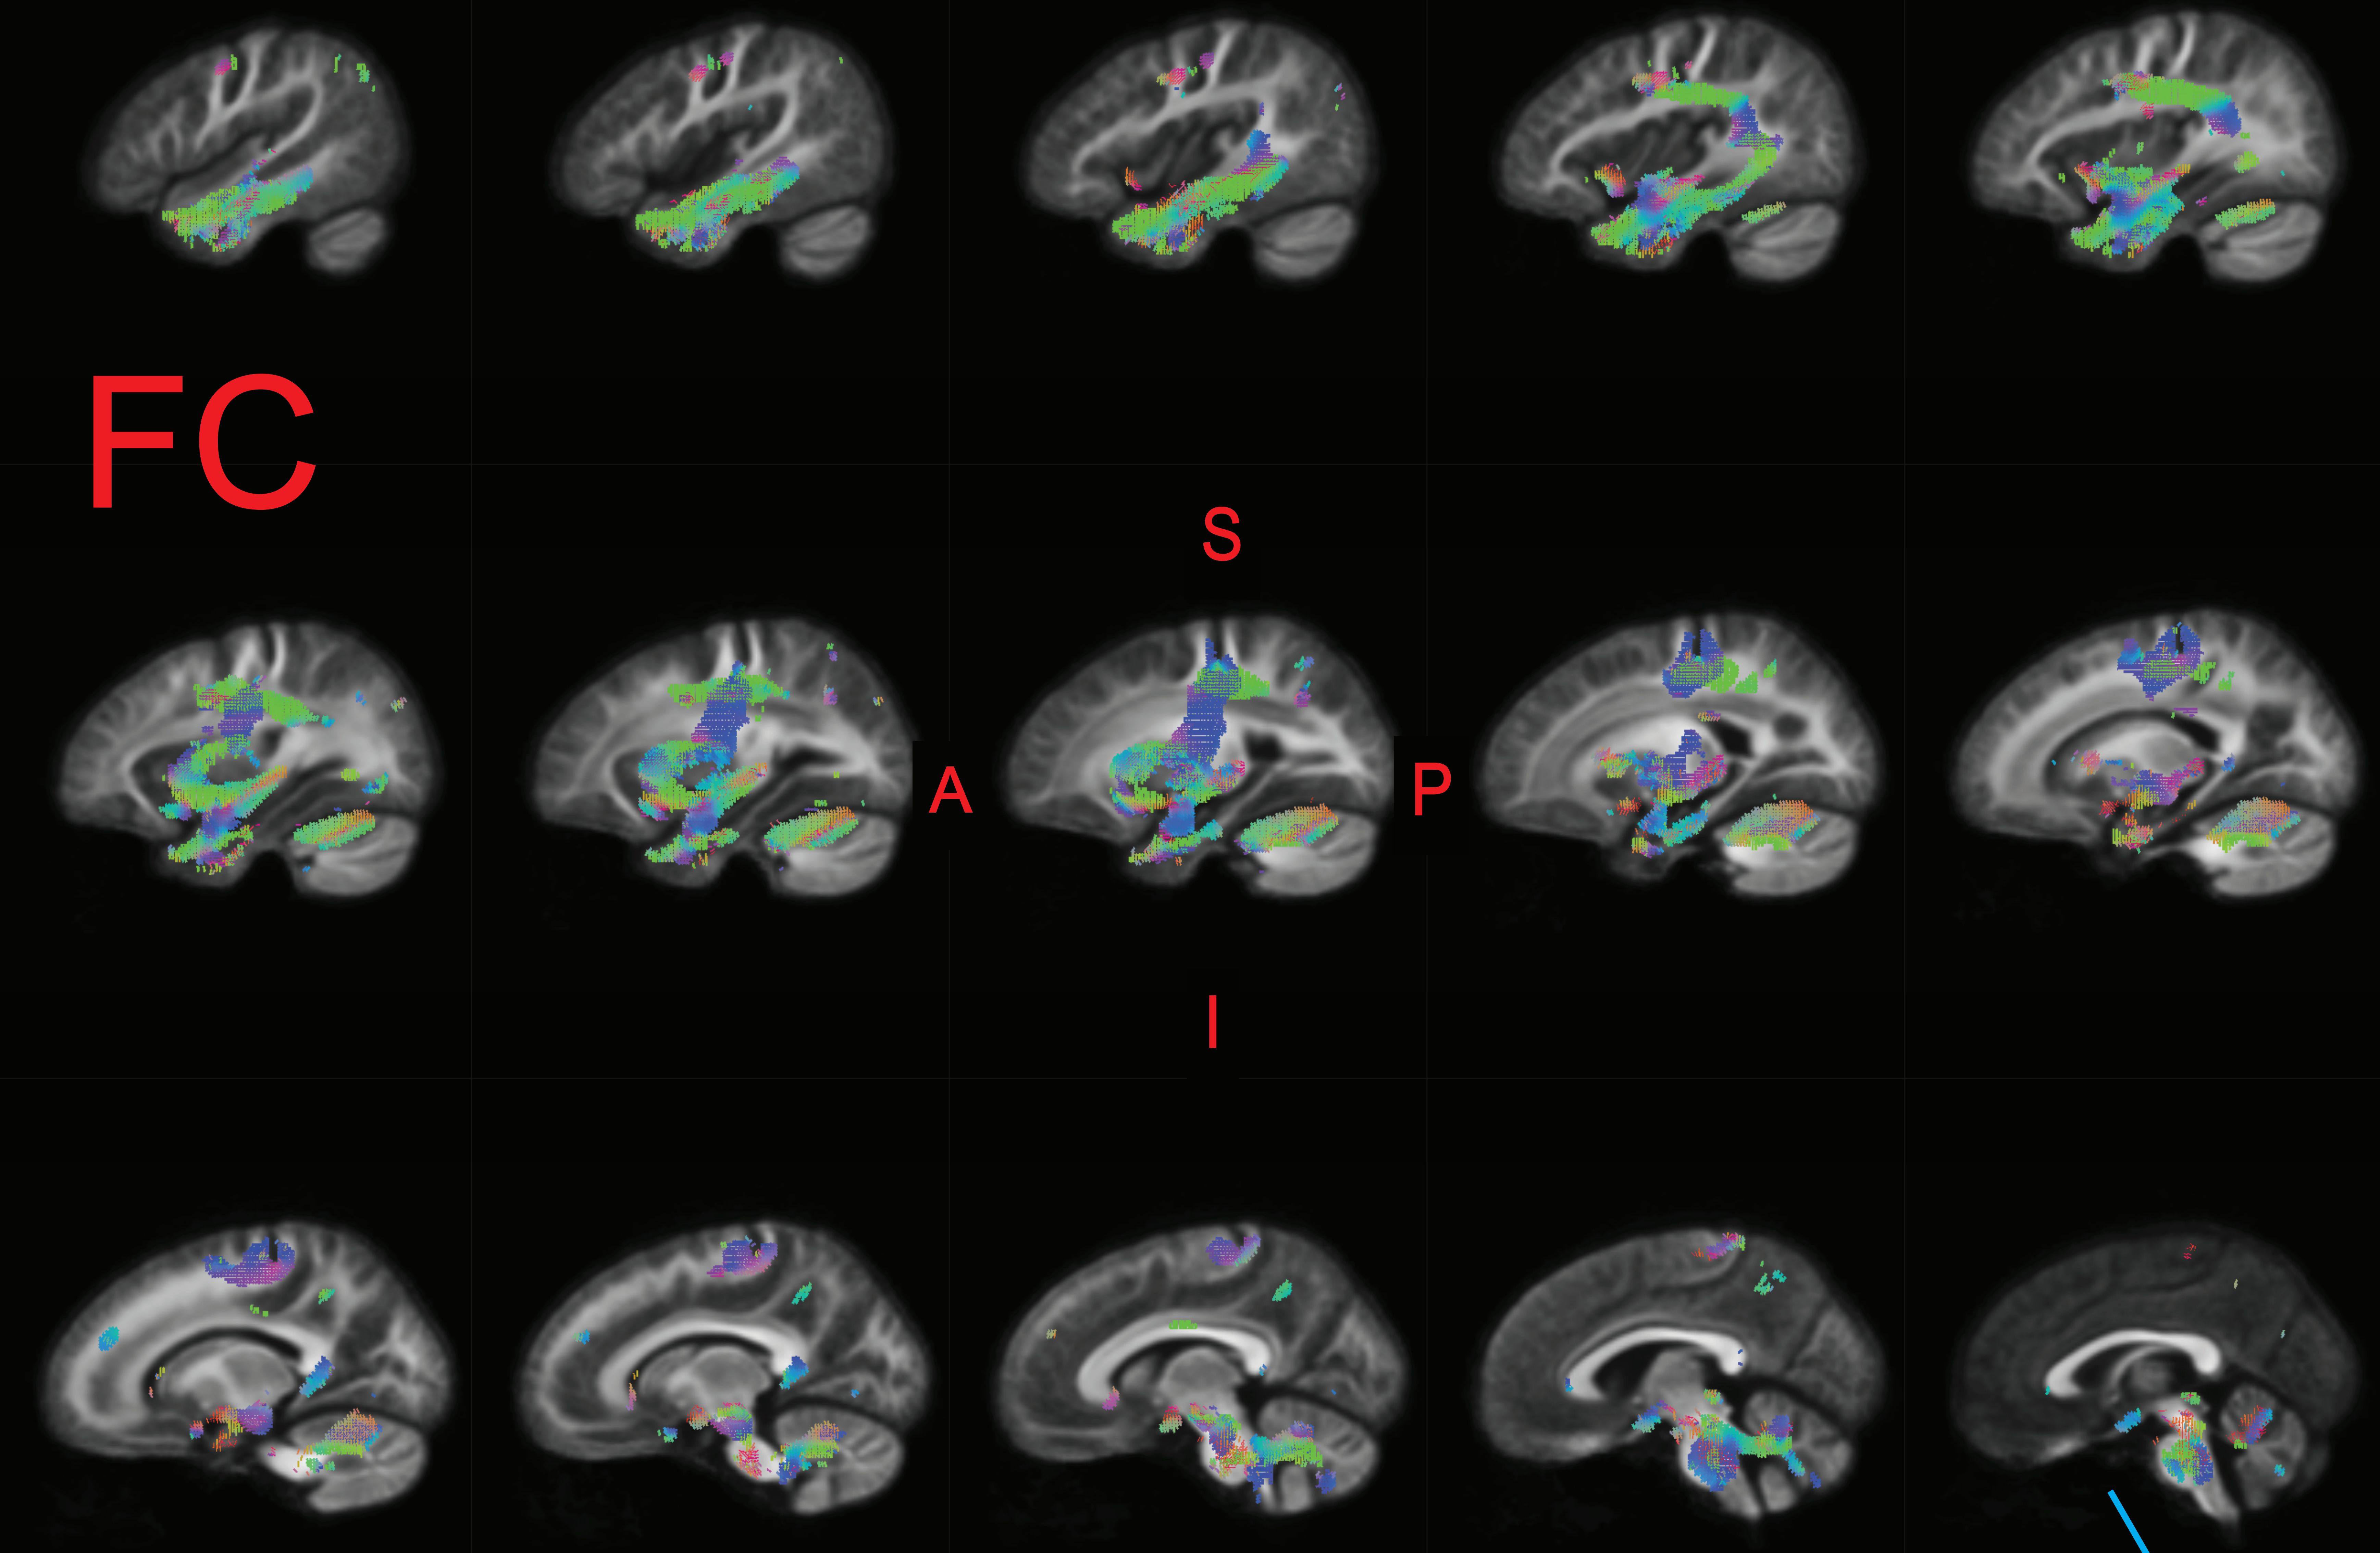

FD

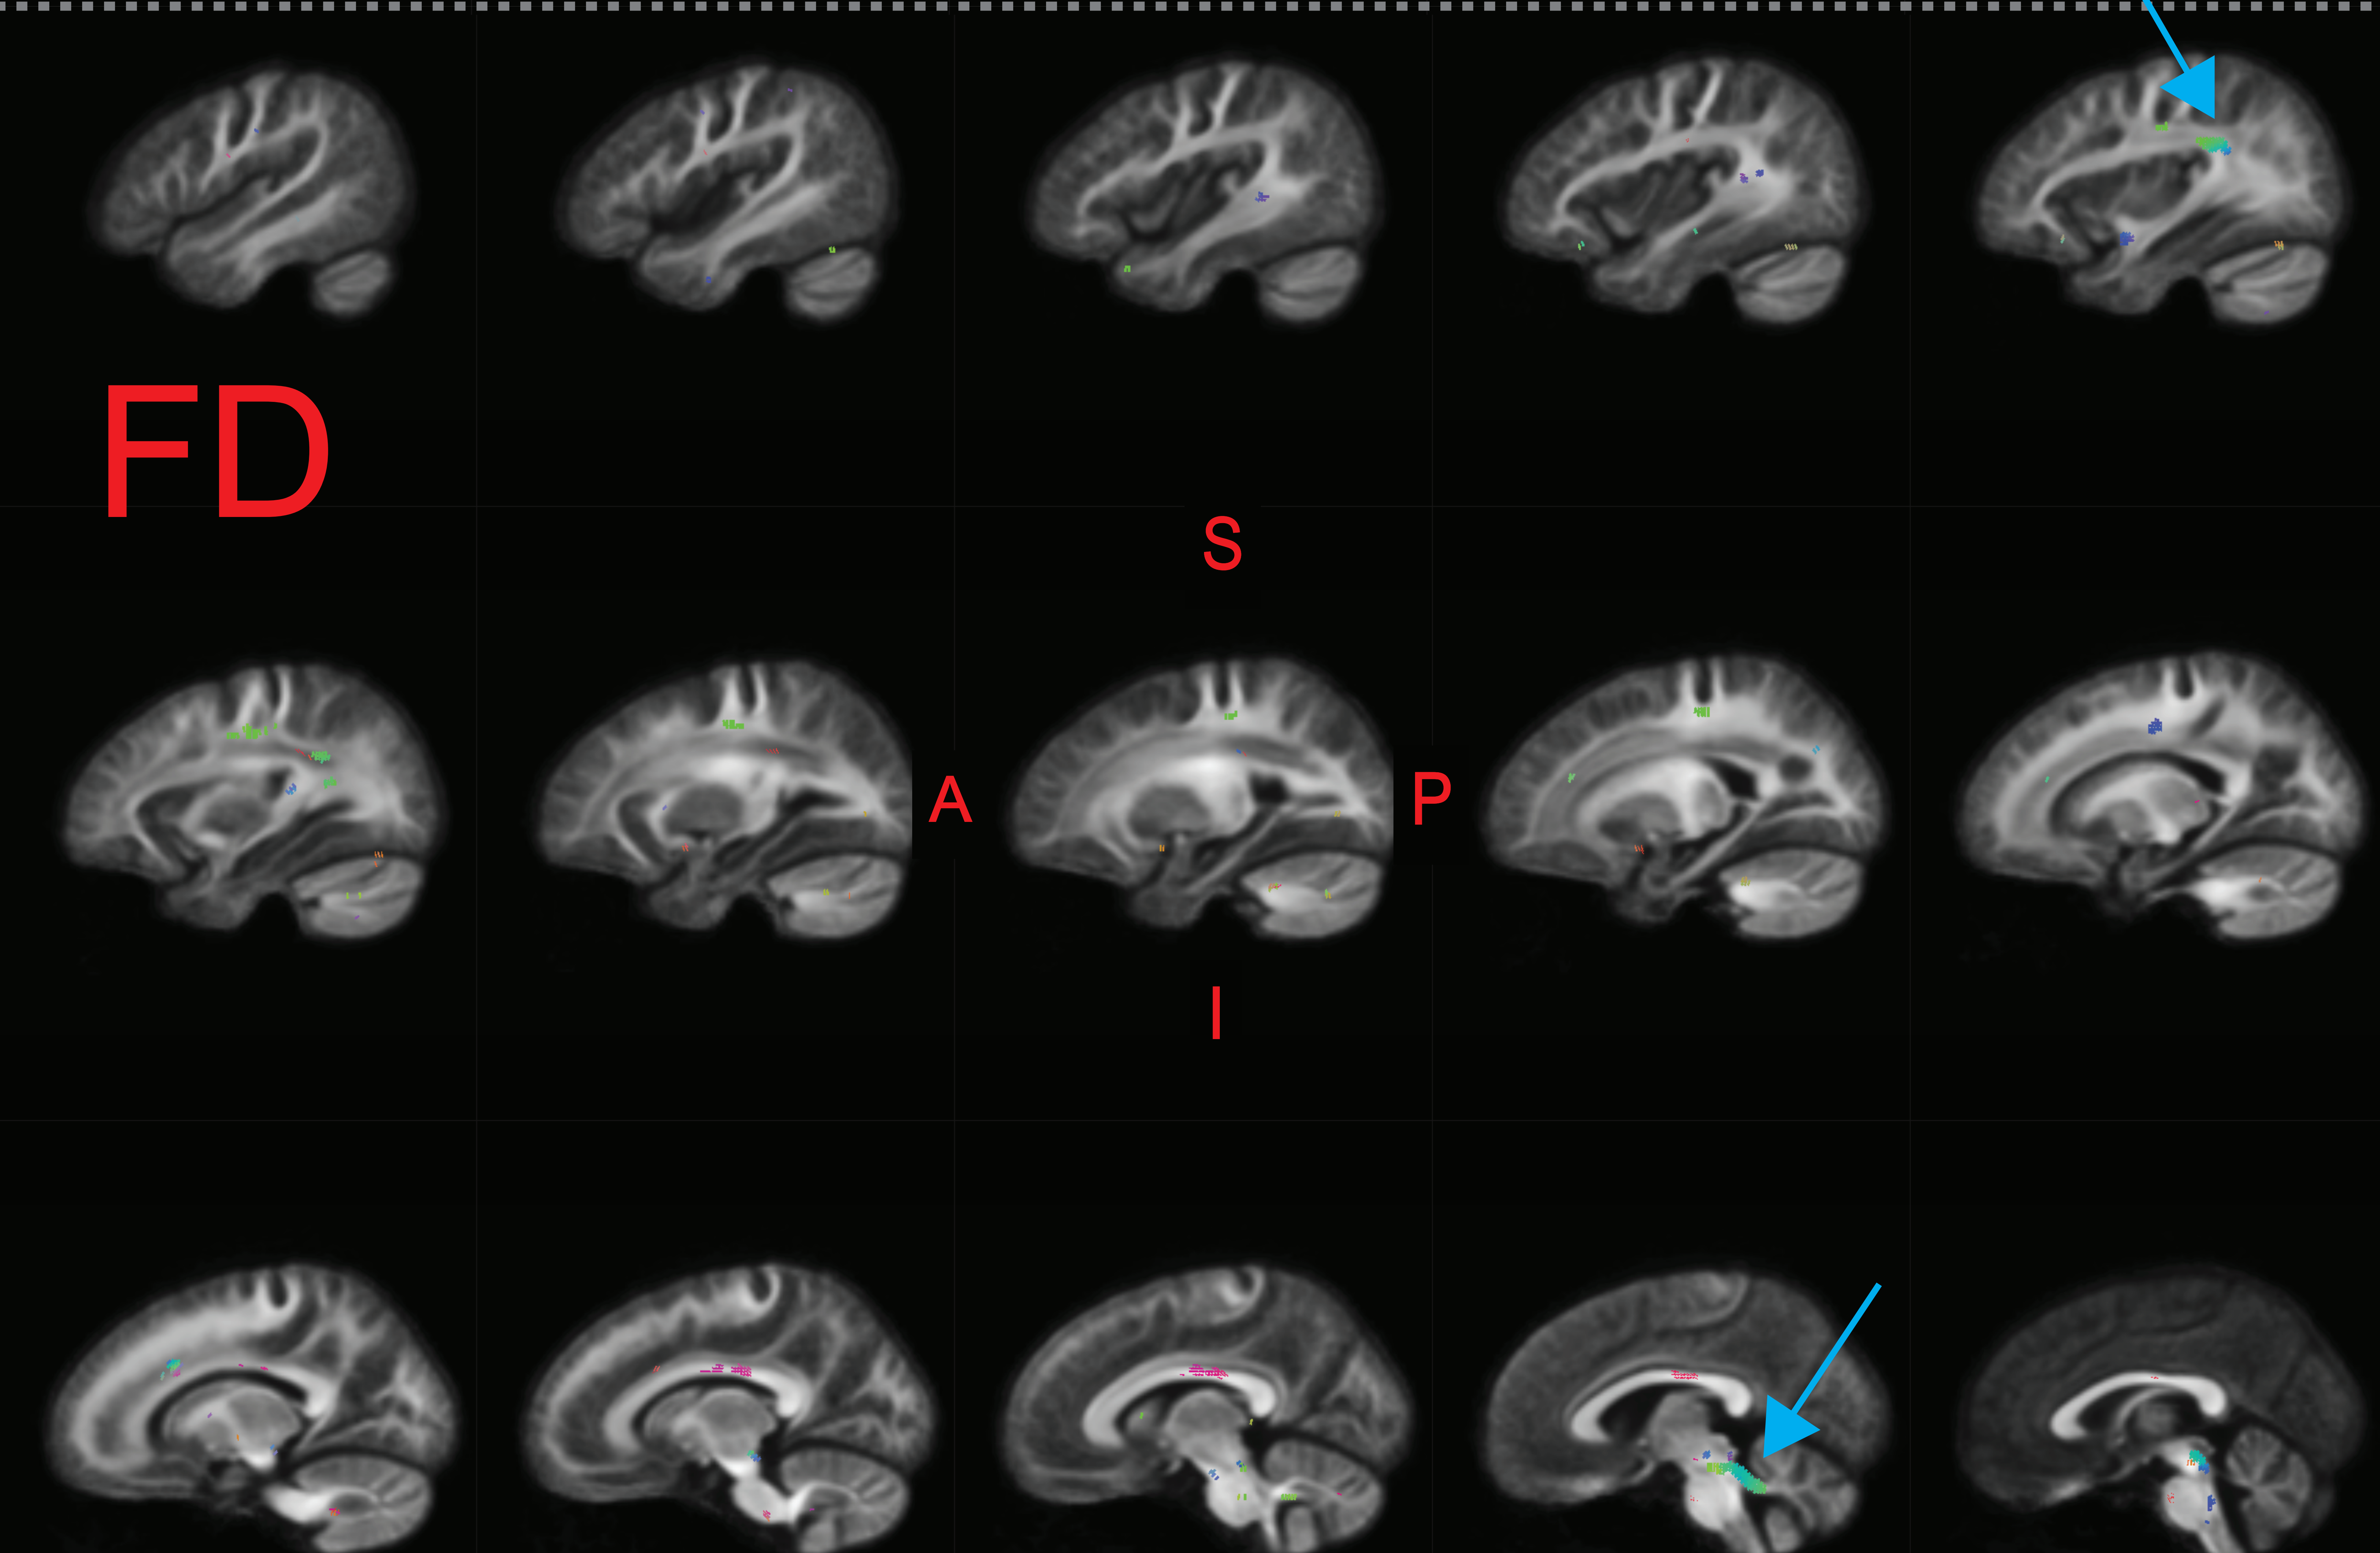

Supplement: supp [file elife-82088-supp-v1.zip]

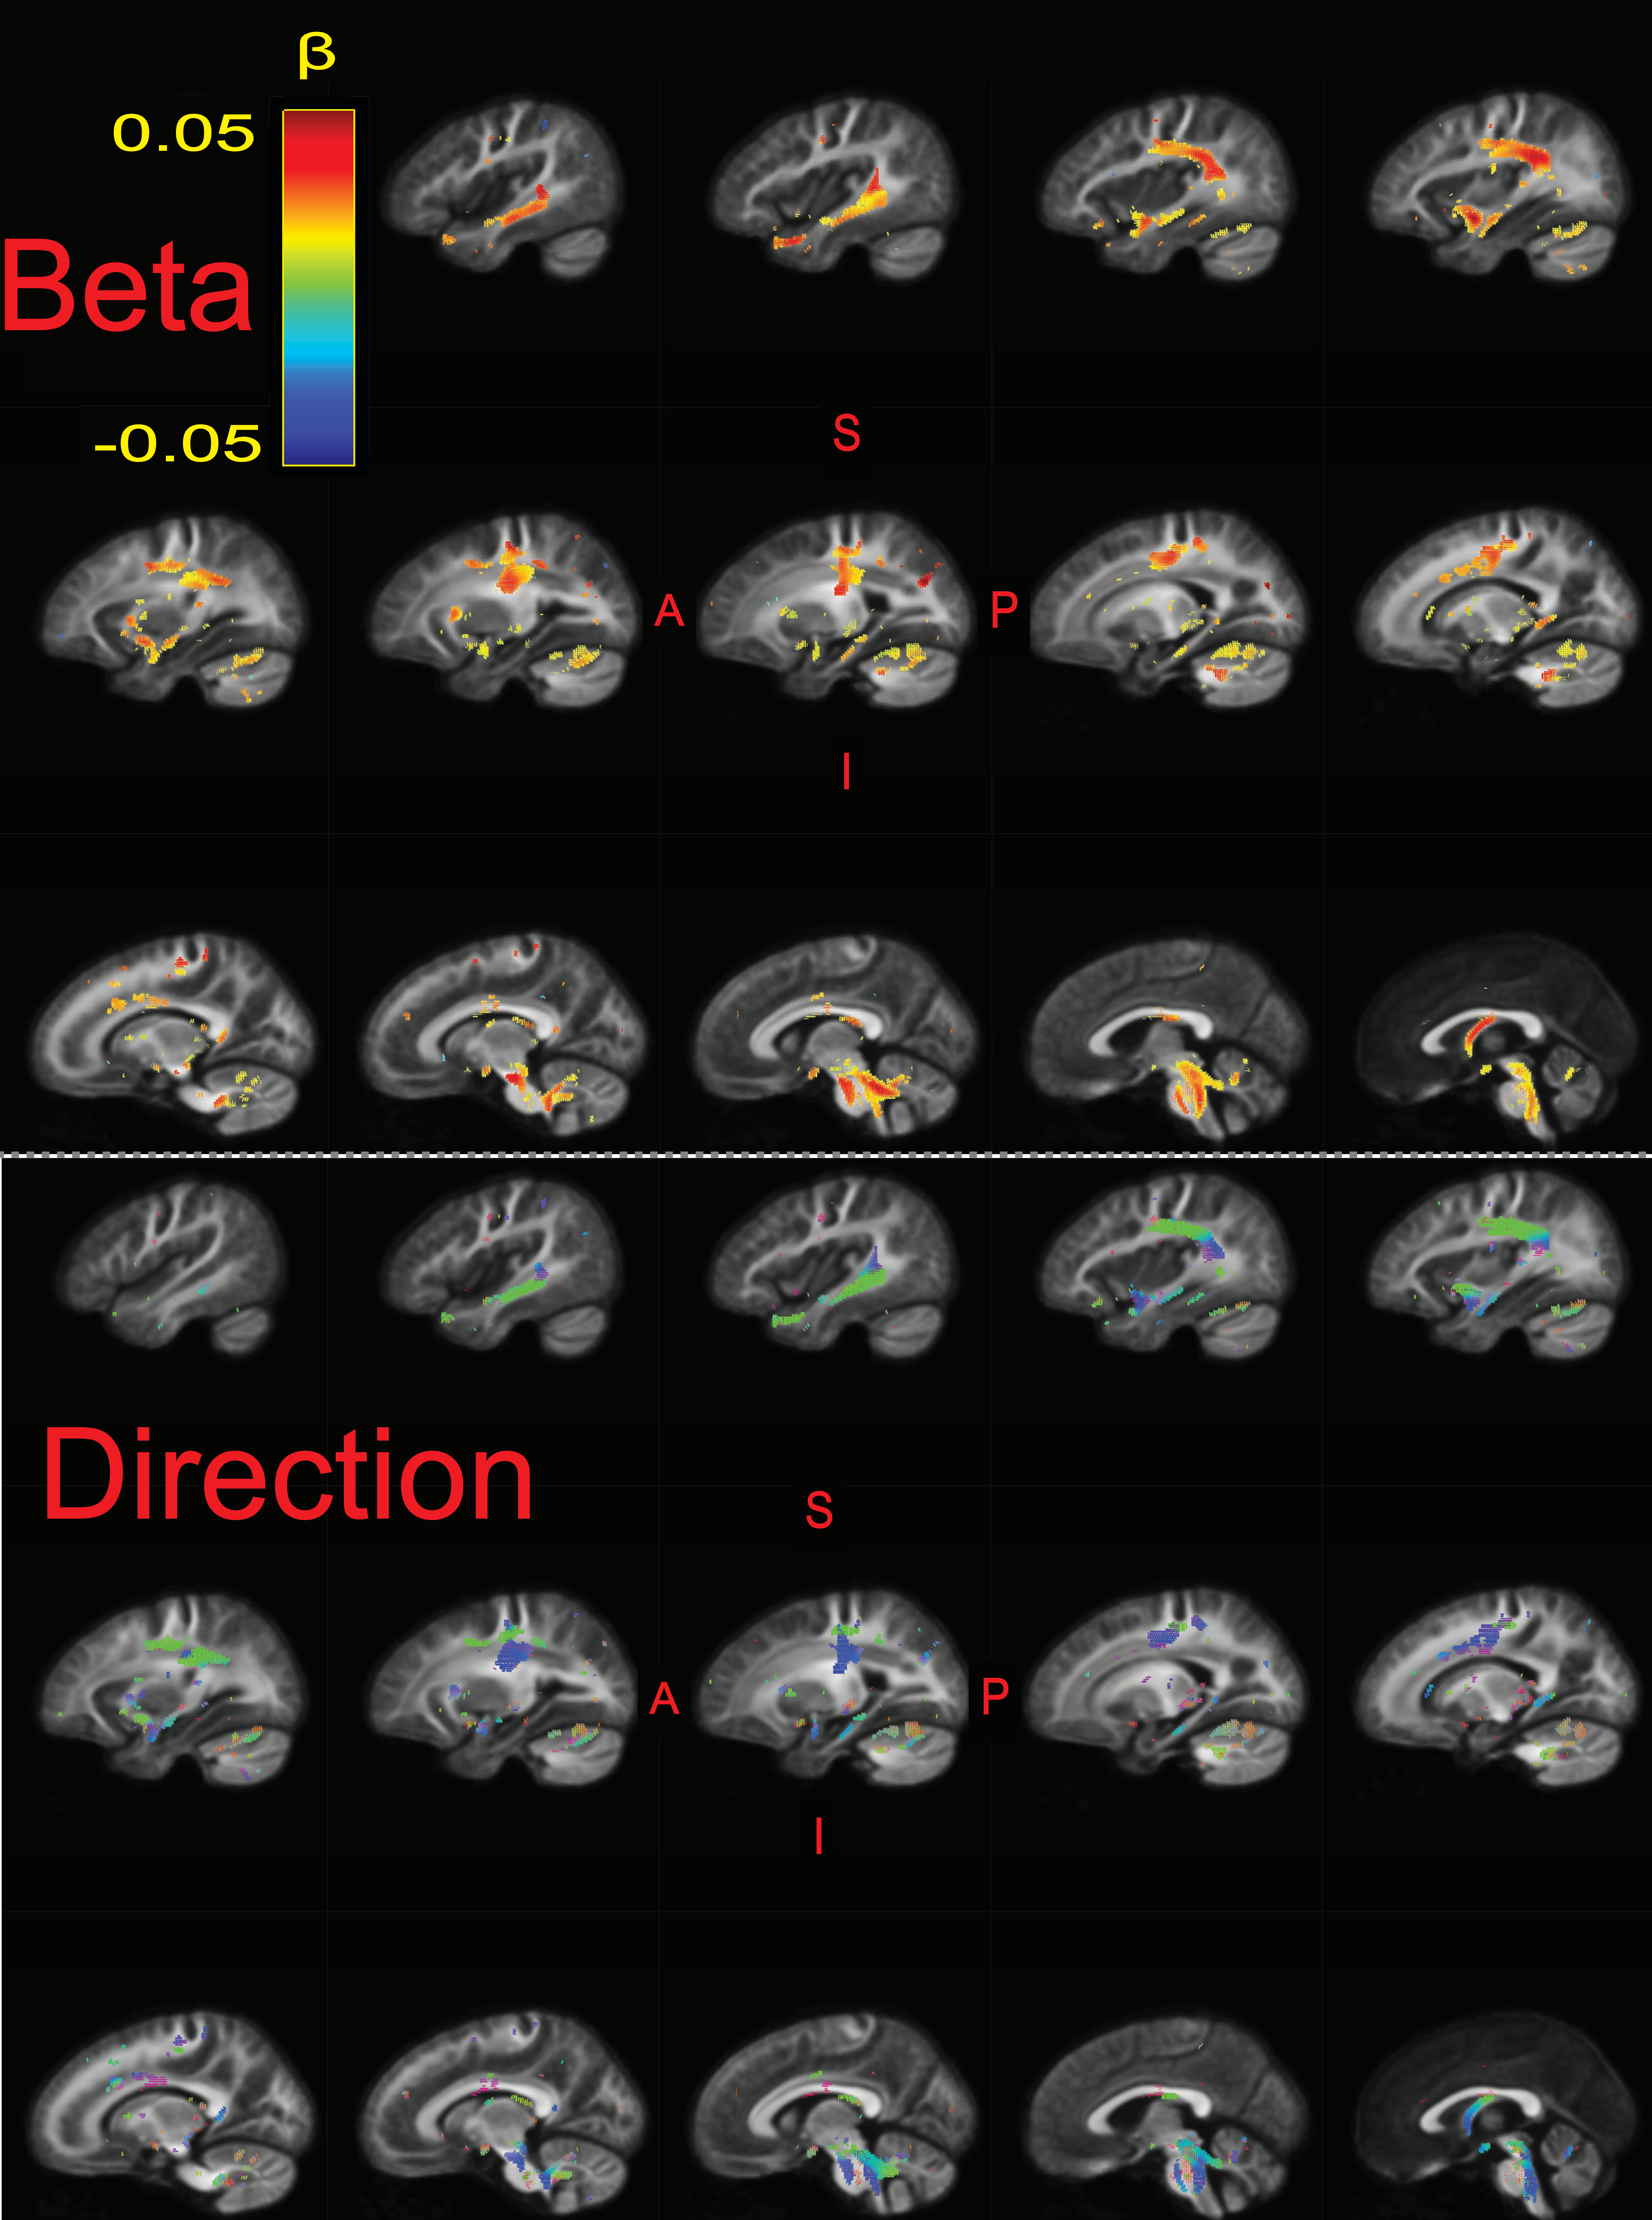

Supplement: supp [file elife-82088-supp-v1.zip]

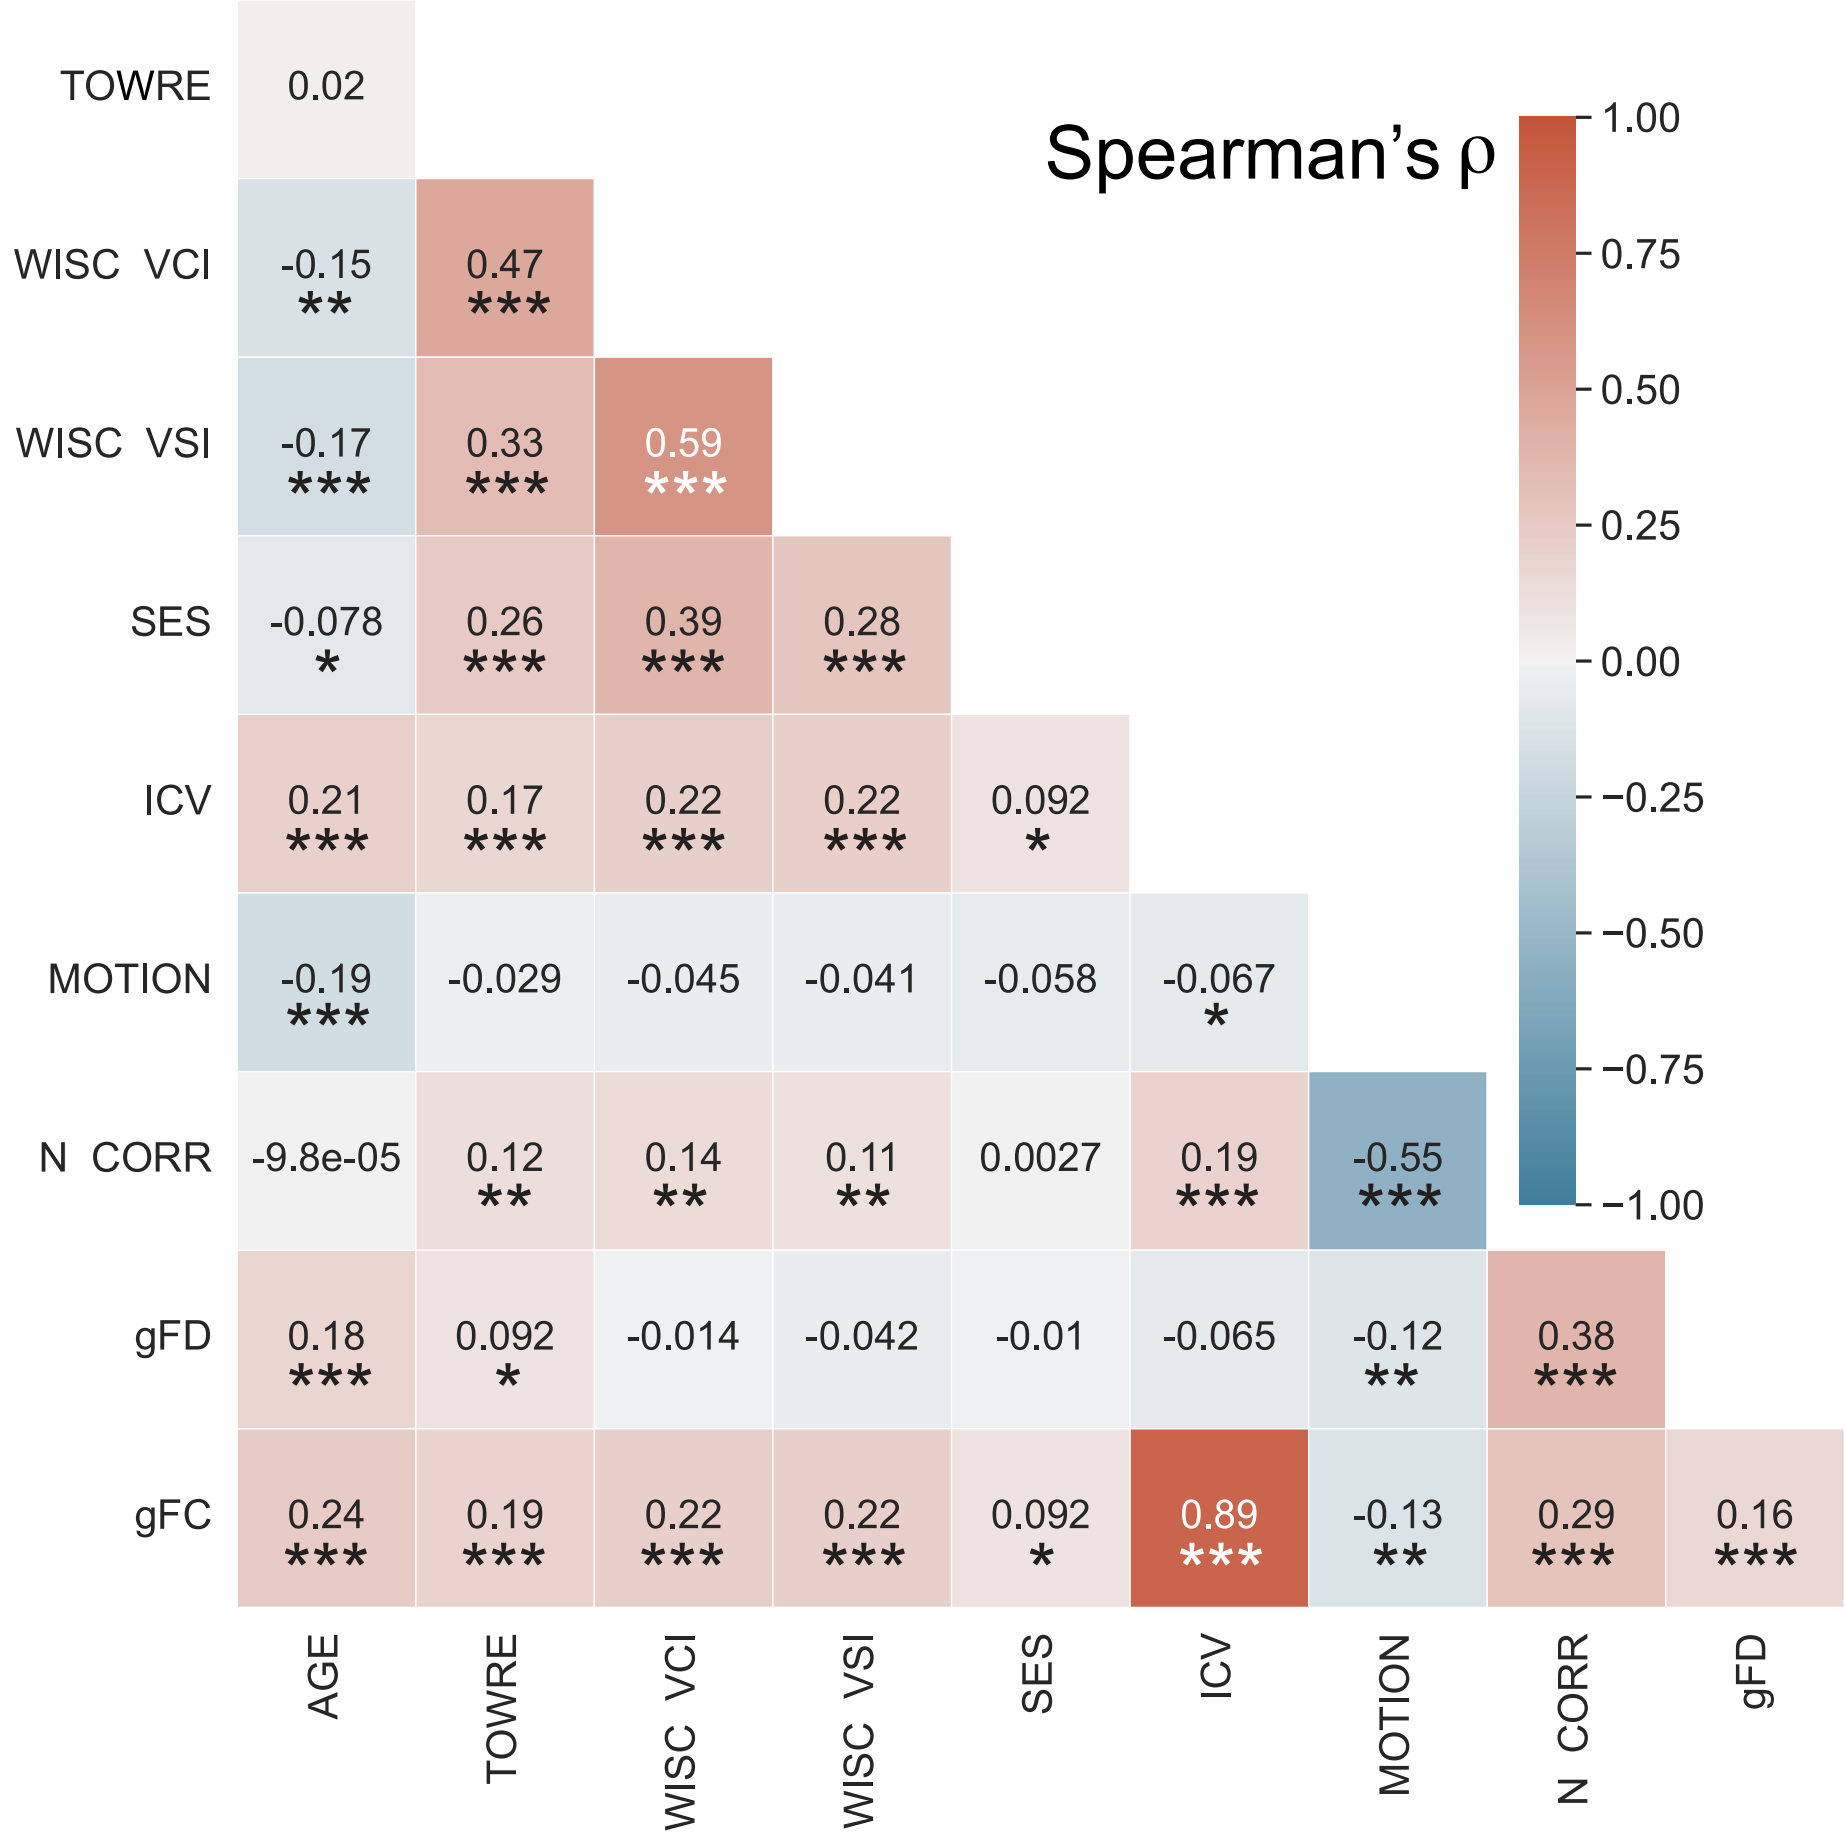

Supplement: supp [file elife-82088-supp-v1.zip]
